# Supplementary material for: Rationalization of hydrogen production by bulk g-C3N4: an in-depth correlation between physico-chemical parameters and solar light photocatalysis
Source: Royal Society of Chemistry journal article supplement (doi:10.1039/c8ra08880b), 2018-01-01
Supplement: c8ra08880b1.pdf [file c8ra08880b1.pdf]

## Supplementary Information

# Rationalization and of Hydrogen Production by Bulk g-C<sub>3</sub>N<sub>4</sub>: an In-depth Correlation between Physico-chemical Parameters and Solar Light Photocatalysis

Andrea Speltini, Ambra Pisanu, Antonella Profumo, Chiara Milanese, Luigi Sangaletti, Giovanni Drera, Marzia Pentimalli, Maddalena Patrini, Lorenzo Malavasi

### 1. TEM images of Pt-loaded g-C<sub>3</sub>N<sub>4</sub> (DCD 650°C)

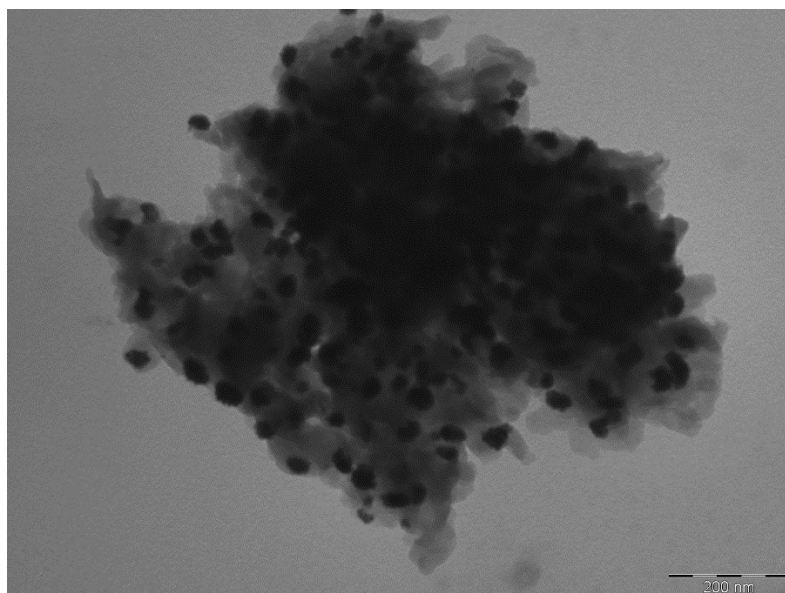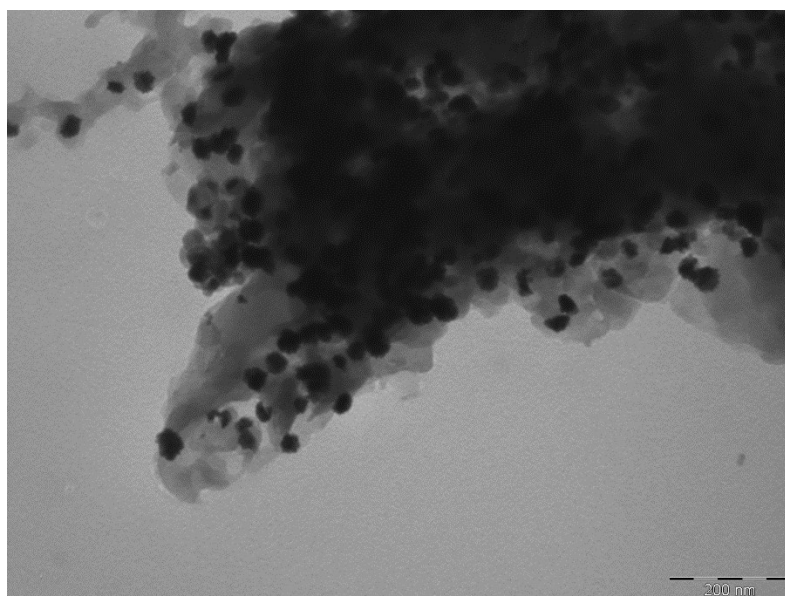

2. TGA curves recorded on each precursor and on the obtained g-C<sub>3</sub>N<sub>4</sub> samples after thermal condensation

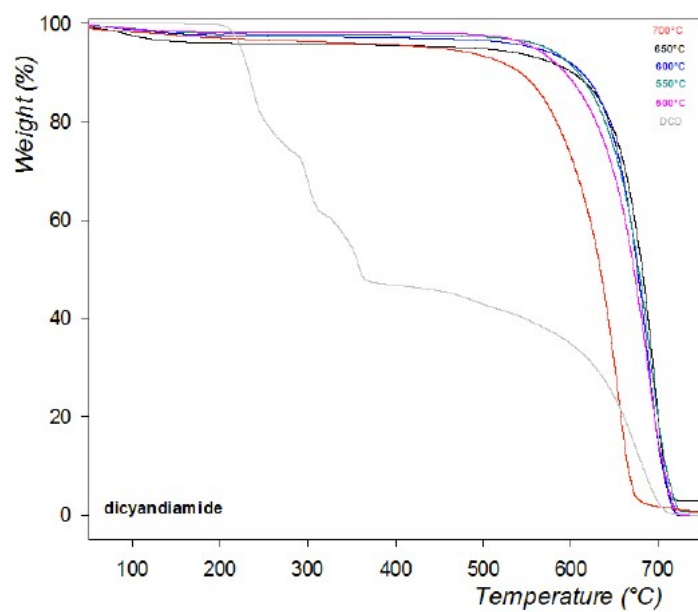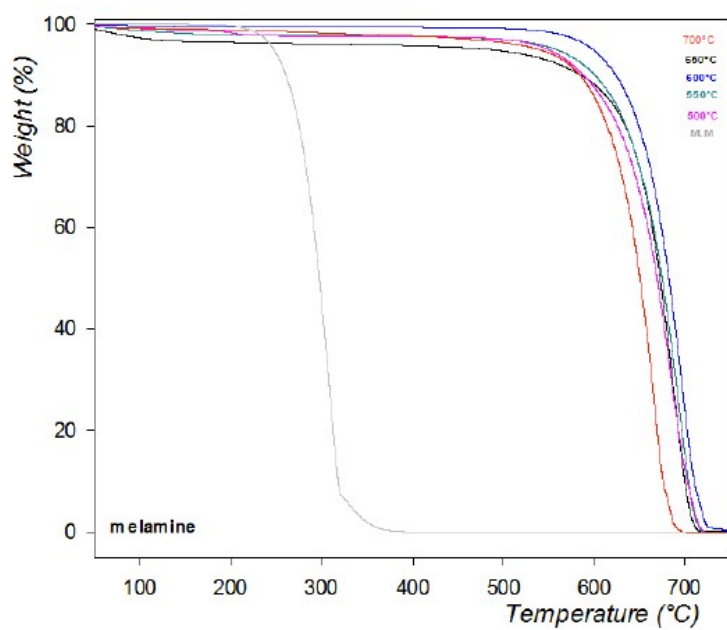

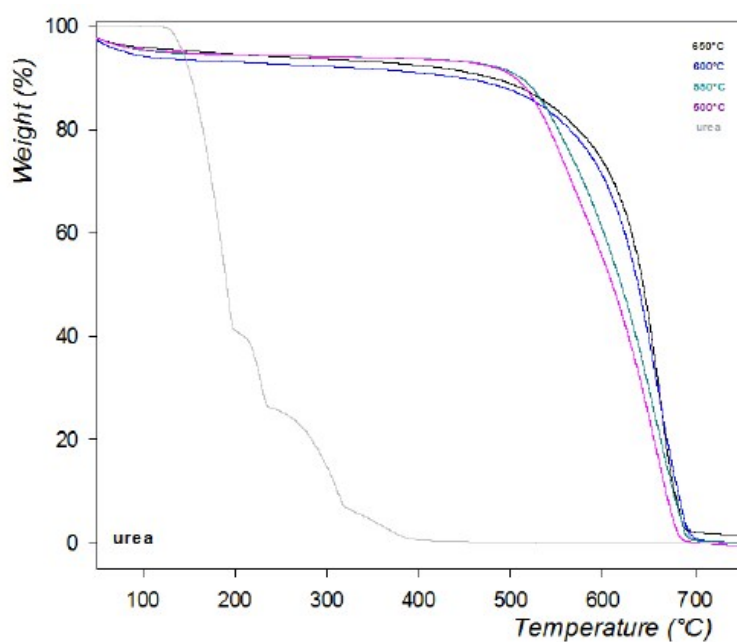

### 3. Apparent quantum yield and turn over number calculated for each g-C<sub>3</sub>N<sub>4</sub> sample

| T (°C) | Apparent quantum yield (%) |     |      |
|--------|----------------------------|-----|------|
|        | DCD                        | MLM | UR   |
| 500    | 1.9                        | 2.1 | 5.7  |
| 550    | 2.5                        | 2.3 | 7.1  |
| 600    | 2.7                        | 2.2 | 10.9 |
| 650    | 10.7                       | 5.1 | 13.4 |
| 700    | 8.0                        | 8.3 | -    |

The apparent quantum yield (AQY) is calculated as the percent ratio moles of H<sub>2</sub>/ moles of incident photons based on the photon flux ( $1.53 \times 10^{-7}$  moles photons/s) measured in the region 300-410 nm by 2-nitrobenzaldehyde actinometry [ref. 28].

| T (°C) | Turn over number |     |     |
|--------|------------------|-----|-----|
|        | DCD              | MLM | UR  |
| 500    | 20               | 21  | 59  |
| 550    | 26               | 24  | 73  |
| 600    | 28               | 22  | 112 |
| 650    | 110              | 52  | 137 |
| 700    | 82               | 86  | -   |

The turn over number (TON) is calculated as the ratio moles of H<sub>2</sub>/moles of Pt [ref. 28].
